# Supplementary material for: Volume of interest delineation techniques for 18F-FDG PET-CT scans during neoadjuvant extremity soft tissue sarcoma treatment in adults: a feasibility study
Source: PubMed Central journal article supplement (PMC5992109; doi:10.1186/s13550-018-0397-1), 2018-06-07

Figure S1. Bland-Altman plots showing the level of agreement between the  $VOI_{man}$  and the  $VOI_{auto/grad/grad+}$  for the serial  $^{18}F$ -FDG PET-CT scans for: **A** SUVmean, **B** total lesion glycolysis (TLG), **C** metabolically active tumor-volume (MATV).

**A**

**Bland-Altman of SUVmean  $VOI_{man}$  vs.  $VOI_{auto}$**

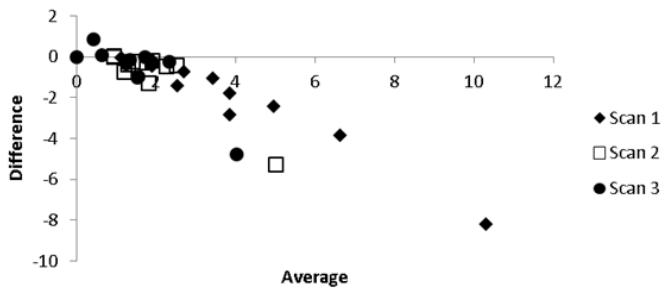

**Bland-Altman of SUVmean  $VOI_{man}$  vs.  $VOI_{auto}$**

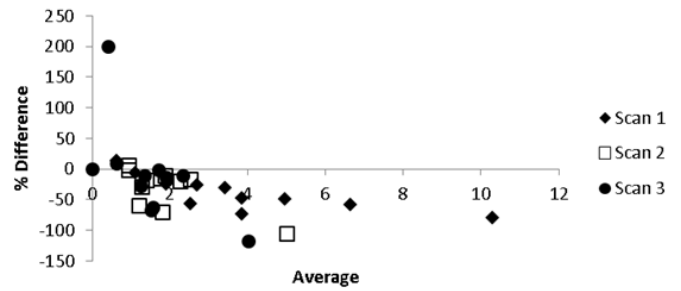

**Bland-Altman of SUVmean  $VOI_{man}$  vs.  $VOI_{grad}$**

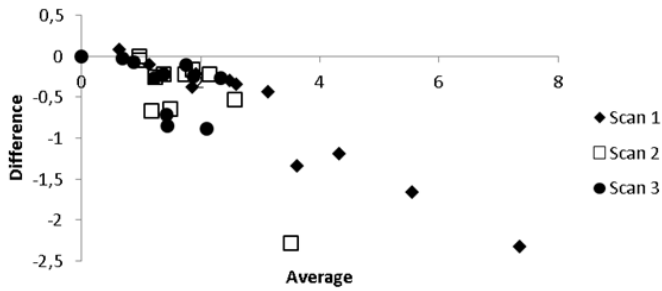

**Bland-Altman of SUVmean  $VOI_{man}$  vs.  $VOI_{grad}$**

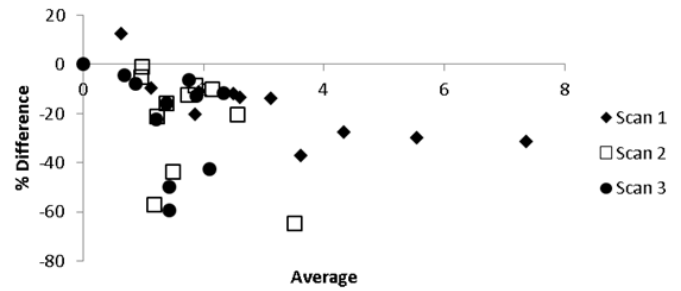

**Bland-Altman of SUVmean  $VOI_{man}$  vs.  $VOI_{grad+}$**

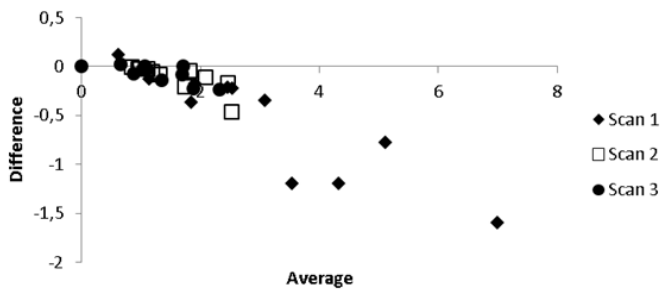

**Bland-Altman of SUVmean  $VOI_{man}$  vs.  $VOI_{grad+}$**

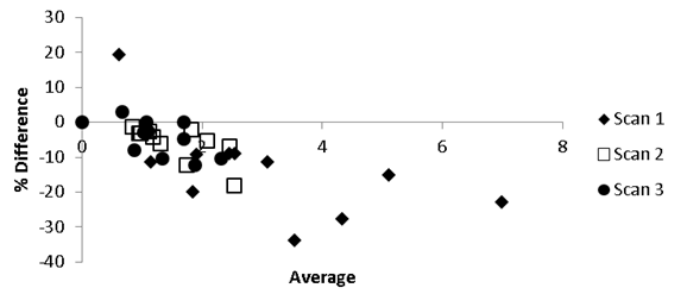

**B**

**Bland-Altman of TLG  
VOI<sub>man</sub> vs. VOI<sub>auto</sub>**

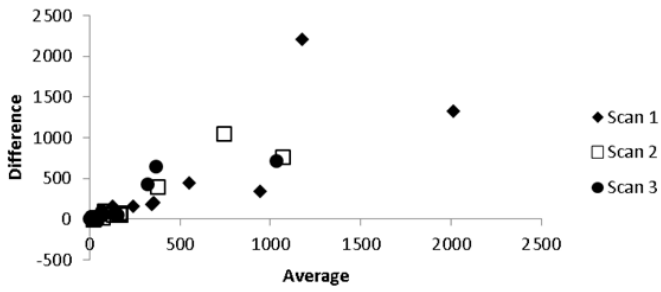

**Bland-Altman of TLG  
VOI<sub>man</sub> vs. VOI<sub>auto</sub>**

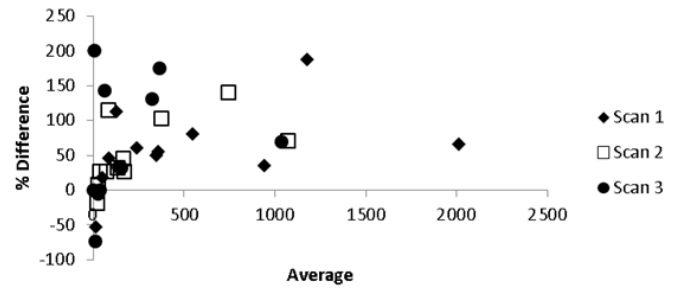

**Bland-Altman of TLG  
VOI<sub>man</sub> vs. VOI<sub>grad</sub>**

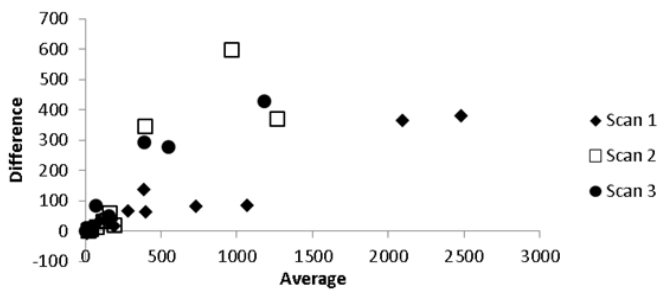

**Bland-Altman of TLG  
VOI<sub>man</sub> vs. VOI<sub>grad</sub>**

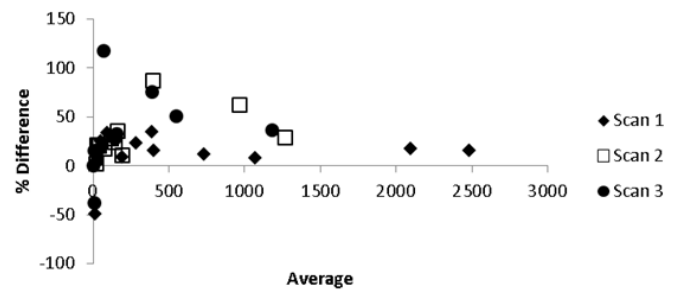

**Bland-Altman of TLG  
VOI<sub>man</sub> vs. VOI<sub>grad+</sub>**

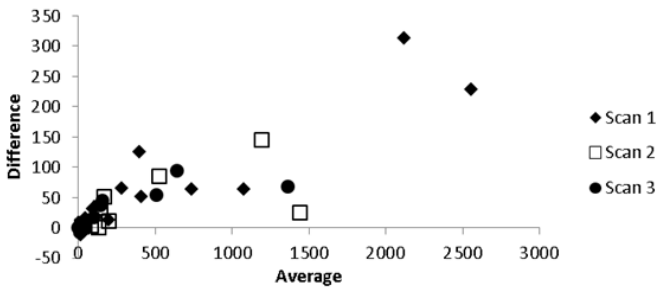

**Bland-Altman of TLG  
VOI<sub>man</sub> vs. VOI<sub>grad+</sub>**

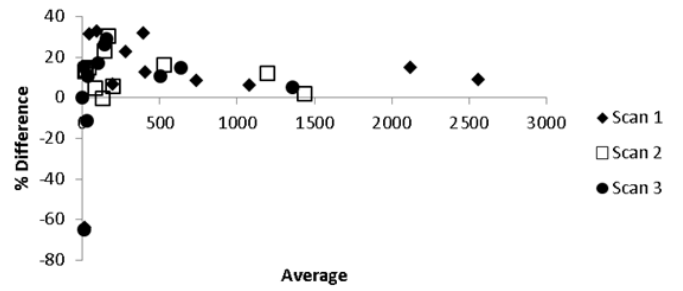

C

**Bland-Altman of MATV  
VOlman vs. VOlauto**

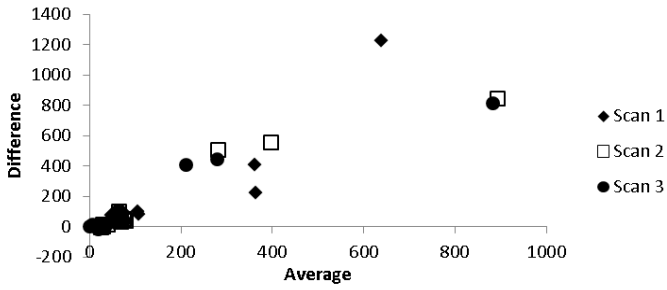

**Bland-Altman of MATV  
VOlman vs. VOlauto**

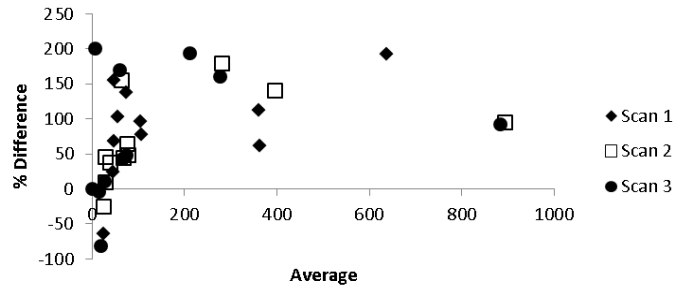

**Bland-Altman of MATV  
VOlman vs. VOlgrad**

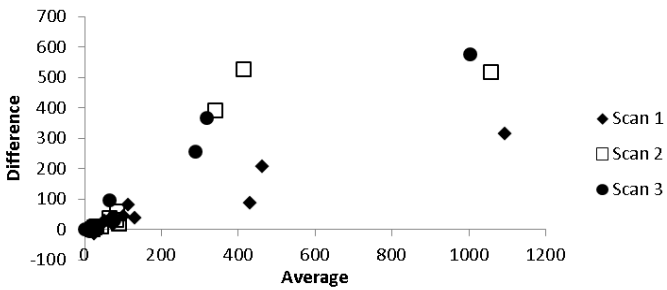

**Bland-Altman of MATV  
VOlman vs. VOlgrad**

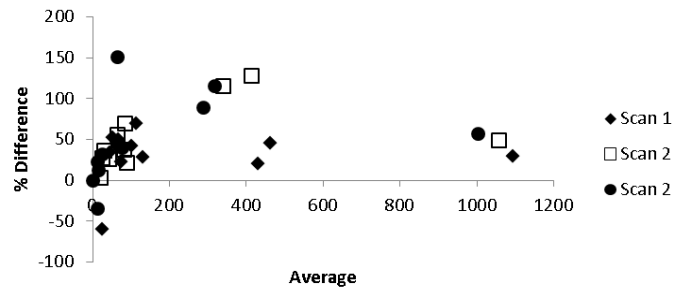

**Bland-Altman of MATV  
VOlman vs. VOlgrad+**

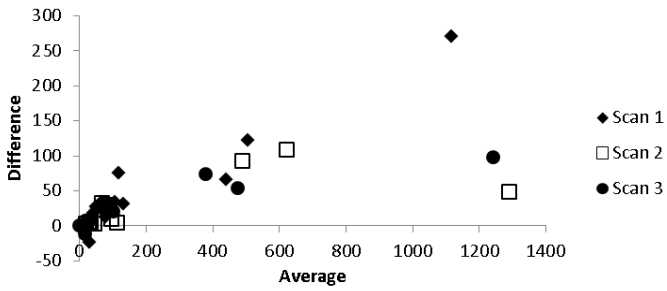

**Bland-Altman of MATV  
VOlman vs. VOlgrad+**

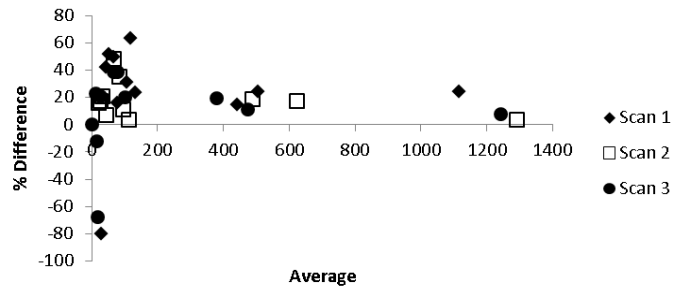

Supplement: 13550_2018_397_MOESM2_ESM.pdf [file 13550_2018_397_MOESM2_ESM.pdf]
